# Supplementary material for: Loss of Apelin Augments Angiotensin II-Induced Cardiac Dysfunction and Pathological Remodeling
Source: PubMed Central journal article supplement (PMC6358887; doi:10.3390/ijms20020239), 2019-01-09
Supplement: ijms-20-00239-s001.pdf [file ijms-20-00239-s001.pdf]

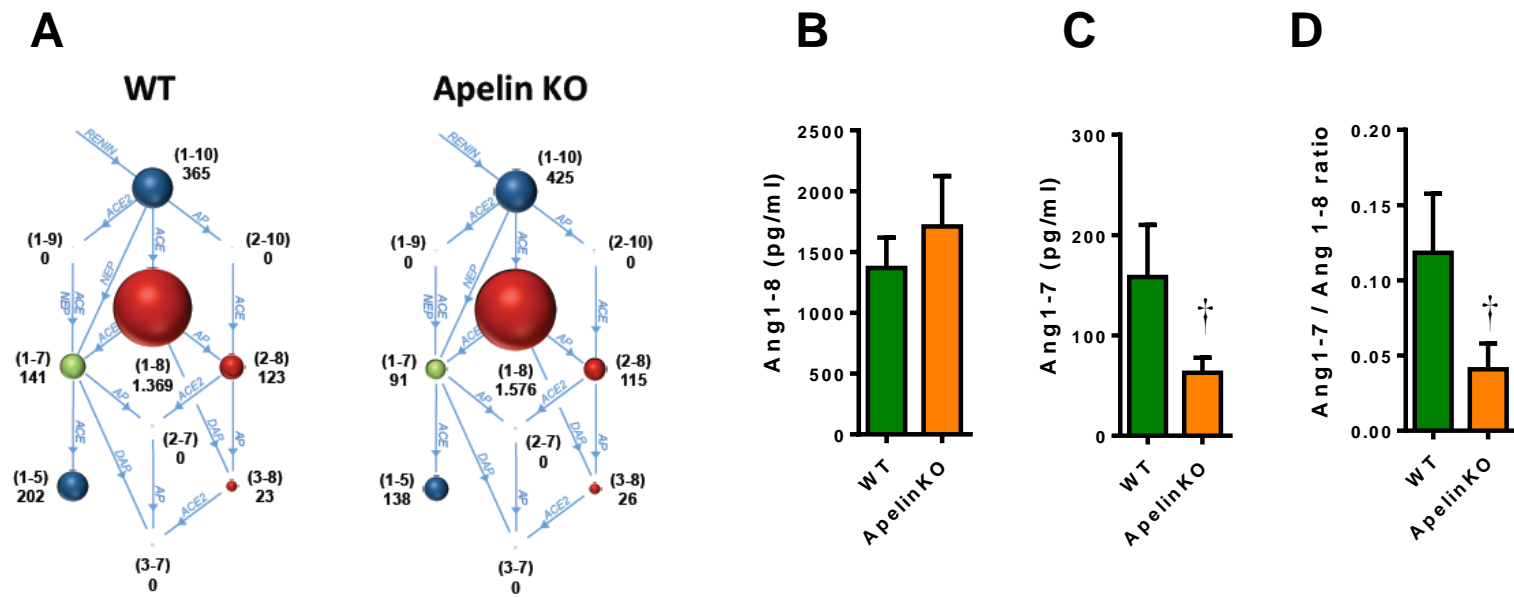

**Legend**  
 Liquid chromatography-tandem mass spectrometry (LC-MS/MS) for angiotensin metabolites in the *ex vivo* equilibrated plasma of wild type and Apelin KO mice (n = 5-8 per group). **A**, The diameter of the spheres reflects the concentration of each one of the 10 peptides: Ang (1-10), (1-9), (1-7), (1-5), (1-8), (2-7), (3-7), (2-10), (2-8), and (3-8). Values are given in picograms per milliliter next to each individual sphere; 0 pg/mL indicates concentrations below detection limits. Ang II levels (**B**), Ang 1-7 levels (**C**) and Ang 1-7 to Ang II ratios (**D**) are shown for the each group.

**Figure S1**

### Supplementary Table S1

| Gene          | Primers | Sequence (5'-3')          |
|---------------|---------|---------------------------|
| <i>BNP</i>    | Forward | ATGGATCTCCTGAAGGTGCTG     |
|               | Reverse | GTGCTGCCTTGAGACCGAA       |
| <i>b-MHC</i>  | Forward | GCAGCAGTTGGATGAGCGAC      |
|               | Reverse | TGCTCCTCCAGCCTTTCAC       |
| <i>ANF</i>    | Forward | TGAGAAAAGCACGGAGGTATCC    |
|               | Reverse | AGAGTTTTGAAAGTTGCTCACATCA |
| <i>Ace</i>    | Forward | TGAGAAAAGCACGGAGGTATCC    |
|               | Reverse | AGAGTTTTGAAAGTTGCTCACATCA |
| <i>Ace2</i>   | Forward | CTACAGGCCCTTCAGCAAAG      |
|               | Reverse | TGCCCAGACCCTAGAGTTGT      |
| <i>Col81a</i> | Forward | TCAGACTCATTTCAGGCCGGTGC   |
|               | Reverse | CGCGCAAACCTGGCTAACGGTAC   |
| <i>Tgfb2</i>  | Forward | AGAAGCGCGCTTTGGATGCTGC    |
|               | Reverse | TGGGACACACAGCAAGGGGAAG    |
| <i>Postn</i>  | Forward | TGCTCTGCTGCTGCTGTTCCCTG   |
|               | Reverse | TGCTGGAGGGCACAGACGTTTTG   |
| <i>GAPDH</i>  | Forward | CCCATCACCATCTTCCAGGA      |
|               | Reverse | GGGGCCATCCACAGTCTTCT      |
| <i>18S</i>    | Forward | AAACGGCTACCACATCCAAG      |
|               | Reverse | CCTCCAATGGATCCTCGTTA      |
